# Supplementary material for: Quercetin-3-Glucoside Extracted from Apple Pomace Induces Cell Cycle Arrest and Apoptosis by Increasing Intracellular ROS Levels
Source: MDPI journal article supplement (doi:10.3390/ijms221910749), 2021-10-04
Supplement: s1 [file s1]

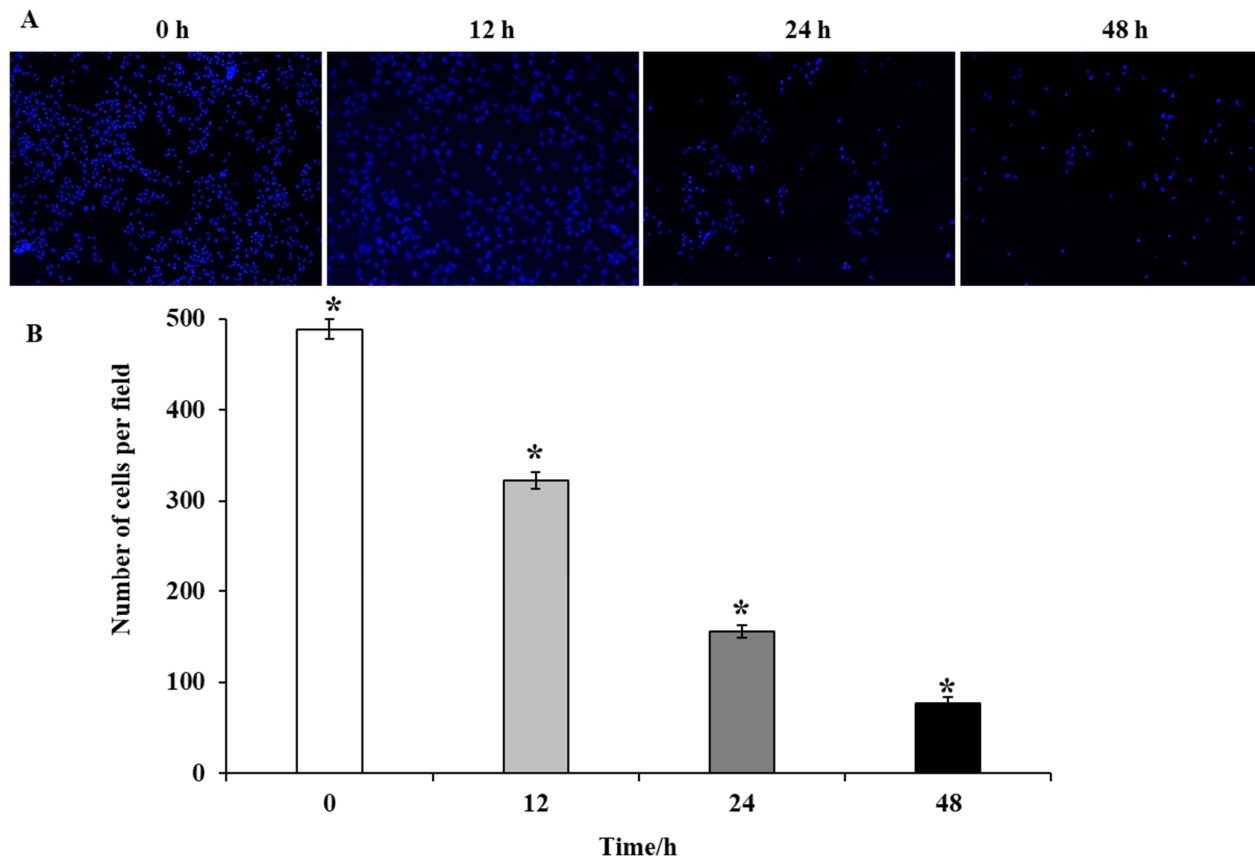

**Figure S1.** Immunocytochemistry DAPI staining after Q3G treatment. **(A):** Effect of Q3G on HeLa cells treated for 0-48 h. **(B):** The total numbers of cells per field were counted and are shown in the graph. Asterisks indicate a statistically significant difference as compared with control (\* $P < 0.05$ ).
